# Supplementary material for: Sequence features that drive human promoter function and tissue specificity
Source: HighWire-hosted journal article supplement (doi:10.1101/gr.100370.109), 2010-05-25
Supplement: summaryCumulativeMotifs.hcg.hela.pdf [file summaryCumulativeMotifs.hcg.hela.pdf]

## AUC (Max=0.997 for 112 motifs)

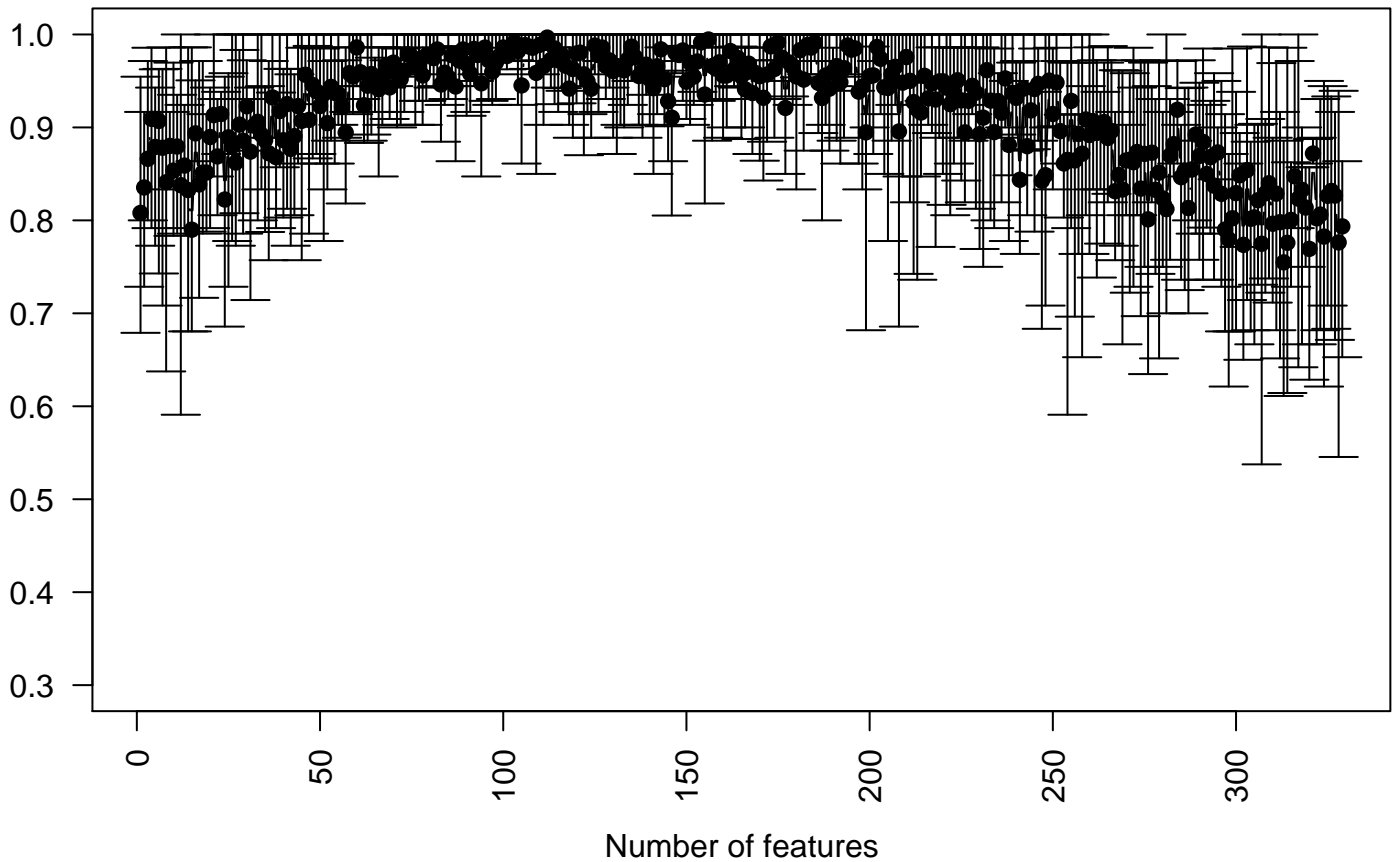

### TOP 20 MOTIFS

Elk.1.M00025  
RCGCANGCGY\_NRF.1.M1018  
Staf.M00264  
ACTWSNACTNY\_unknown.M1122  
GCGNNANTTCC\_CREL.M1065  
CREB.M00113  
STAT1.M00224  
c.Ets.2.M00340  
CAGCTG\_AP.4.M1032  
NF.muE1.M00651  
CGTSACG\_PAX.3.M1087  
NF.1.M00806  
GTTGNYNNRGNAAC\_unknown.M1060  
Tax\_CREB.M00115  
CCGNMNTNACG\_unknown.M1123  
YTCCCRNNAGGY\_unknown.M1131  
myogenin\_NF.1.M00056  
p53\_decamer.M00761  
Pax.8.M00328  
Xvent.1.M00445
