# Supplementary material for: Sequence features that drive human promoter function and tissue specificity
Source: HighWire-hosted journal article supplement (doi:10.1101/gr.100370.109), 2010-05-25
Supplement: summaryCumulativeMotifs.lcg.hct116.pdf [file summaryCumulativeMotifs.lcg.hct116.pdf]

## AUC (Max=0.874 for 81 motifs)

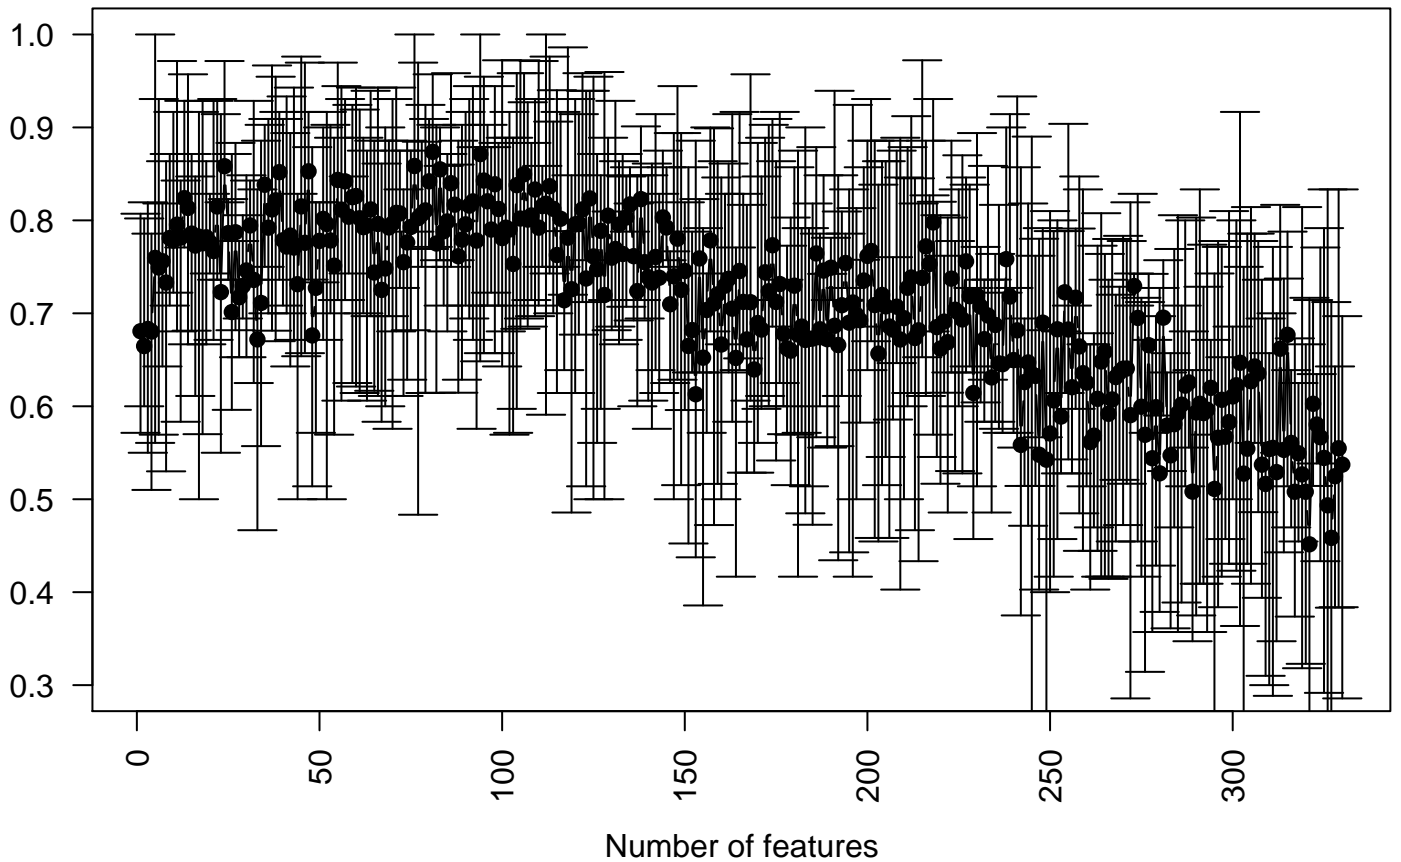

TOP 20 MOTIFS  
LXR\_PXR\_CAR\_COUP\_RAR.M00965  
TNCATNTCCYR\_STAT1.M1092  
TGCTGAY\_unknown.M1109  
TGACATY\_unknown.M1059  
NF.kappaB\_p65.M00052  
FOXJ2.M00423  
GGARNTKYCCA\_unknown.M1180  
CGTSACG\_PAX.3.M1087  
GGGYGTGNY\_unknown.M1048  
Roaz.M00467  
Evi.1.M00011  
RACTNNRTTTNC\_unknown.M1083  
Sox.5.M00042  
PR.M00957  
YTTCNNNGGAMR\_unknown.M1167  
Staf.M00262  
zlab\_bidirect\_Nrf.1  
CATRRAGC\_unknown.M1151  
E4F1.M00694  
ISRE.M00258
