# Supplementary material for: Sequence features that drive human promoter function and tissue specificity
Source: HighWire-hosted journal article supplement (doi:10.1101/gr.100370.109), 2010-05-25
Supplement: summaryCumulativeMotifs.lcg.hela.pdf [file summaryCumulativeMotifs.lcg.hela.pdf]

## AUC (Max=0.829 for 23 motifs)

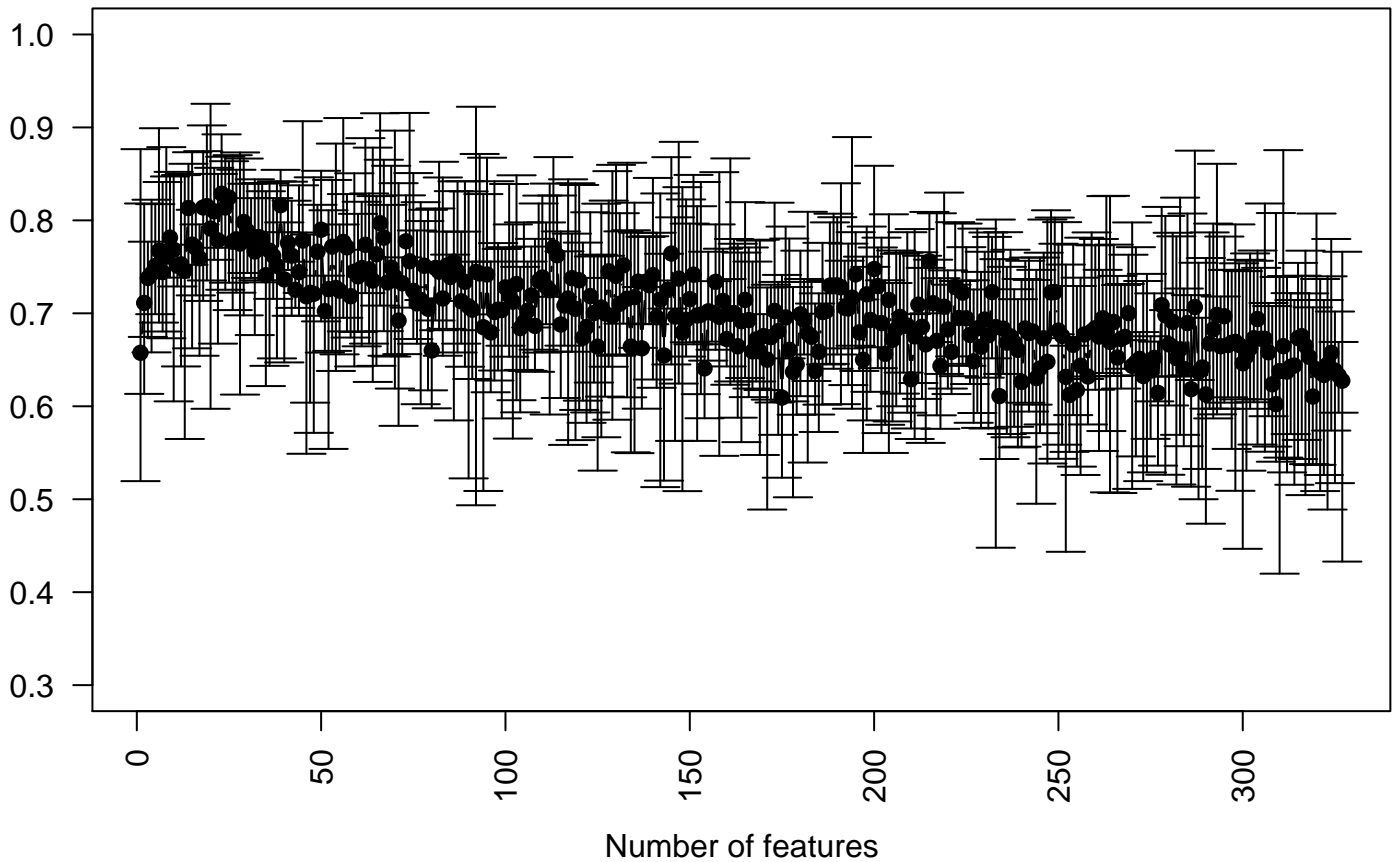

### TOP 20 MOTIFS

EGR.M00807  
zlab\_bidirect\_GABP  
Pax.4.M00380  
AP.2.M00915  
GCCATNTTG\_YY1.M1027  
ERR\_alpha.M00511  
GGATTA\_PITX2.M1110  
GGGAGGRR\_MAZ.M1041  
GGGTGGRR\_PAX.4.M1073  
WGTTNNNNNAAA\_unknown.M1172  
AAAYRNCTG\_unknown.M1094  
GATA.1.M00128  
ACTAYRNNNCCCR\_unknown.M1021  
RYAAAKNNNNNNTTGW\_unknown.M1168  
CDX.M00991  
c.Ets.2.M00340  
ATF3.M00513  
BSAP.M00144  
CTTTGA\_LEF1.M1090  
GCTNWTGK\_unknown.M1095
