# Supplementary material for: Sequence features that drive human promoter function and tissue specificity
Source: HighWire-hosted journal article supplement (doi:10.1101/gr.100370.109), 2010-05-25
Supplement: summaryCumulativeMotifs.lcg.hepg2.pdf [file summaryCumulativeMotifs.lcg.hepg2.pdf]

## AUC (Max=0.986 for 135 motifs)

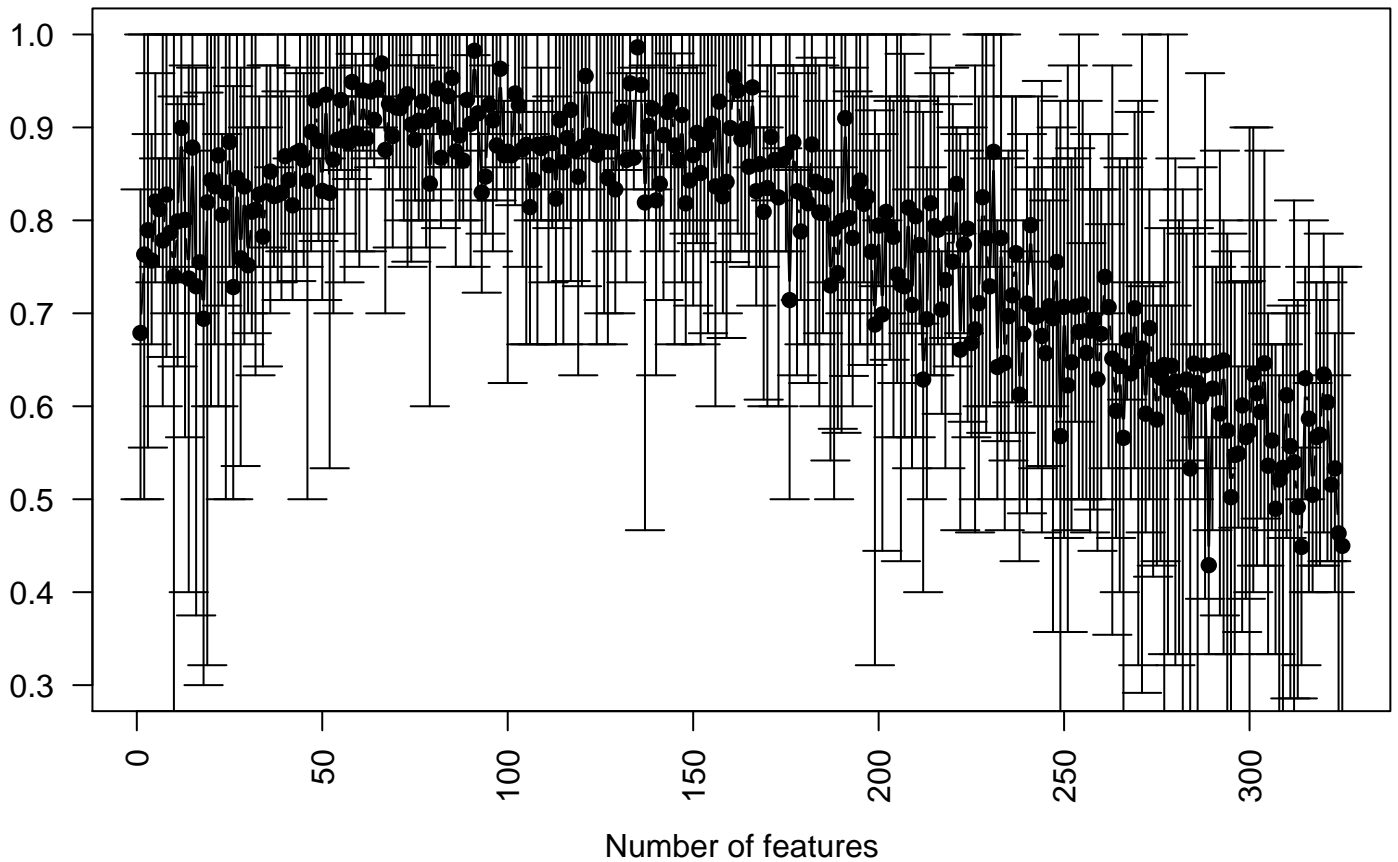

### TOP 20 MOTIFS

PPAR\_HNF.4\_COUP\_RAR.M00762  
FOX.M00809  
MAF.M00983  
Oct.1.M00162  
HNF1.M01011  
Gfi.1.M00250  
HNF4\_COUP.M00967  
GCM.M00634  
E2F.1\_DP.2.M00737  
YKACATTT\_unknown.M1162  
YAATNRNNNNYNATT\_CART.1.M1107  
Cart.1.M00416  
TGACCTTG\_ERRALPHA.M1055  
Egr.1.M00243  
c.Ets.1\_p54.M00032  
MYAATNNNNNNNGGC\_unknown.M1155  
AP.2alpha.M00469  
CCCNNGGAR\_OLF.1.M1147  
neural.restr\_silencer.element.M00325  
PBX.M00998
