# Supplementary material for: Sequence features that drive human promoter function and tissue specificity
Source: HighWire-hosted journal article supplement (doi:10.1101/gr.100370.109), 2010-05-25
Supplement: summaryCumulativeMotifs.lcg.t98g.pdf [file summaryCumulativeMotifs.lcg.t98g.pdf]

## AUC (Max=0.957 for 50 motifs)

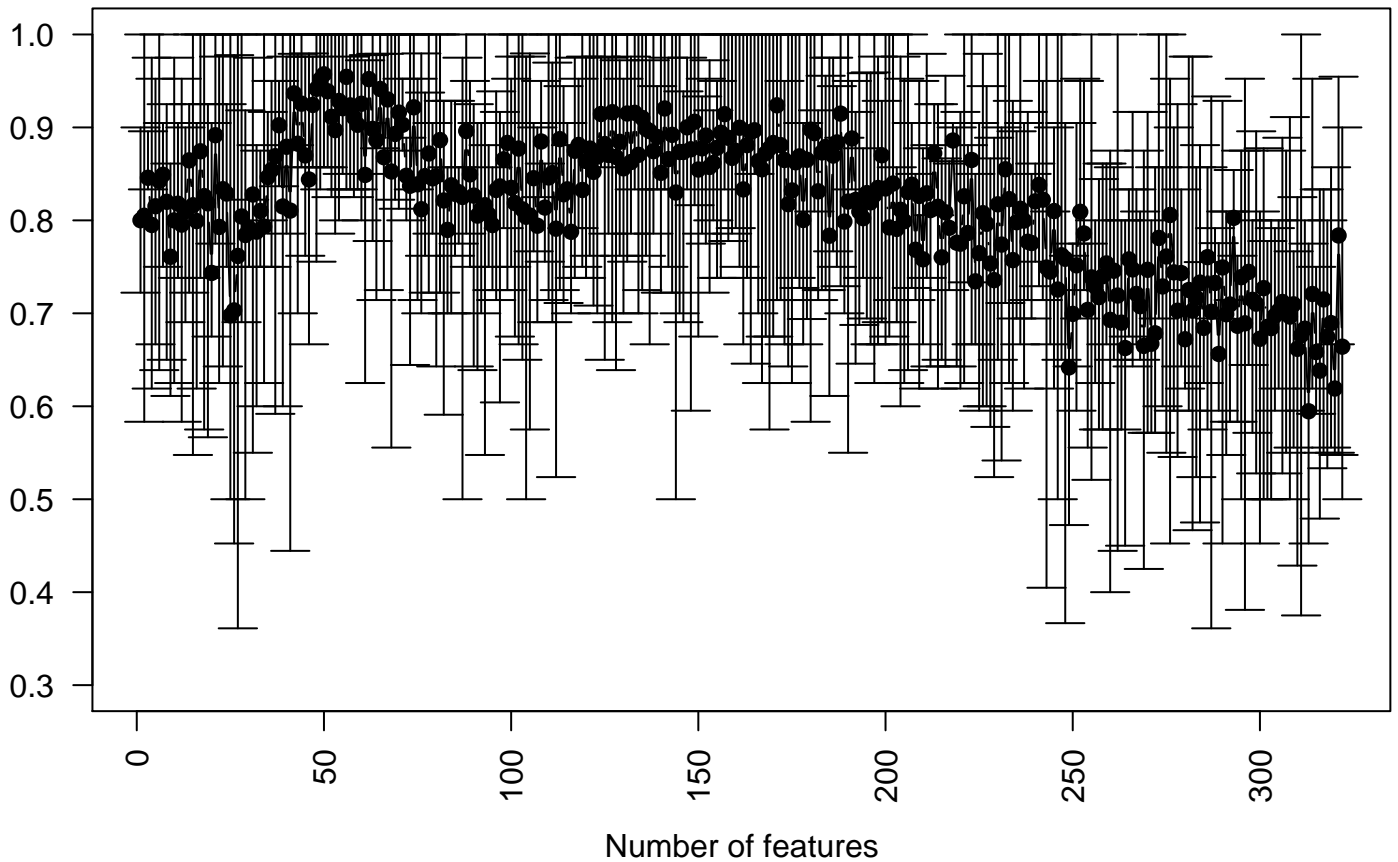

### TOP 20 MOTIFS

Elk.1.M00025

Tax\_CREB.M00114

CTAWWWATA\_RSRFC4.M1045

MEF.2.M00233

GGATTA\_PITX2.M1110

SRF.M00152

Tst.1.M00133

STAT5A\_homotetramer.M00460

Brachyury.M00150

RYTAAWNNNTGAY\_unknown.M1150

AREB6.M00414

SRY.M00148

NRSF.M00256

CAGNYGKNAAA\_unknown.M1177

HNF.4alpha1.M00411

MAZR.M00491

TGGAAG\_NF.AT.M1072

TATA.M00216

RNCTGNYNRNCTGNY\_unknown.M1171

Rb\_E2F.1\_DP.1.M00740
