# Supplementary material for: Sequence features that drive human promoter function and tissue specificity
Source: HighWire-hosted journal article supplement (doi:10.1101/gr.100370.109), 2010-05-25
Supplement: summaryCumulativeMotifs.lcg.u87mg.pdf [file summaryCumulativeMotifs.lcg.u87mg.pdf]

## AUC (Max=0.896 for 163 motifs)

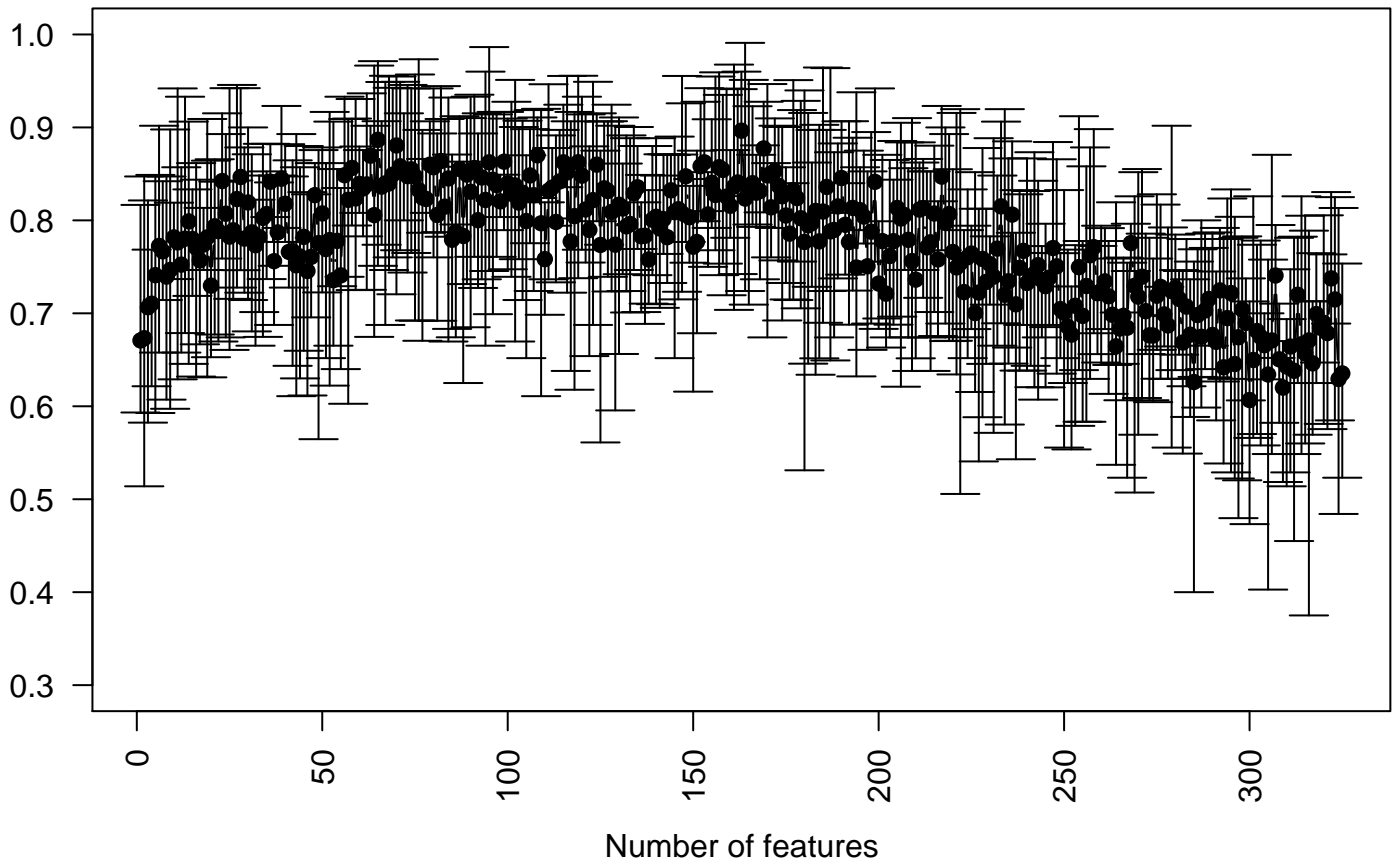

### TOP 20 MOTIFS

EGR.M00807  
zlab\_bidirect\_GABP  
FXR\_RXR.alpha.M00631  
GATA.2.M00349  
CIZ.M00734  
Staf.M00264  
YTAAYNGCT\_unknown.M1185  
Nrf.1.M00652  
Pax.8.M00717  
MTF.1.M00650  
NF.kappaB.M00194  
TGANTCA\_AP.1.M1024  
Brachyury.M00150  
CCCNNNNNNAAGWT\_unknown.M1175  
Ik.1.M00086  
TGTTTGY\_HNF.3.M1100  
Evi.1.M00081  
STAT5A\_homodimer.M00457  
neural.restr\_silencer.element.M00325  
FAC1.M00456
