# Supplementary material for: Sequence features that drive human promoter function and tissue specificity
Source: HighWire-hosted journal article supplement (doi:10.1101/gr.100370.109), 2010-05-25
Supplement: summaryCumulativeMotifs.lcg.ubiquitous.pdf [file summaryCumulativeMotifs.lcg.ubiquitous.pdf]

## AUC (Max=0.925 for 6 motifs)

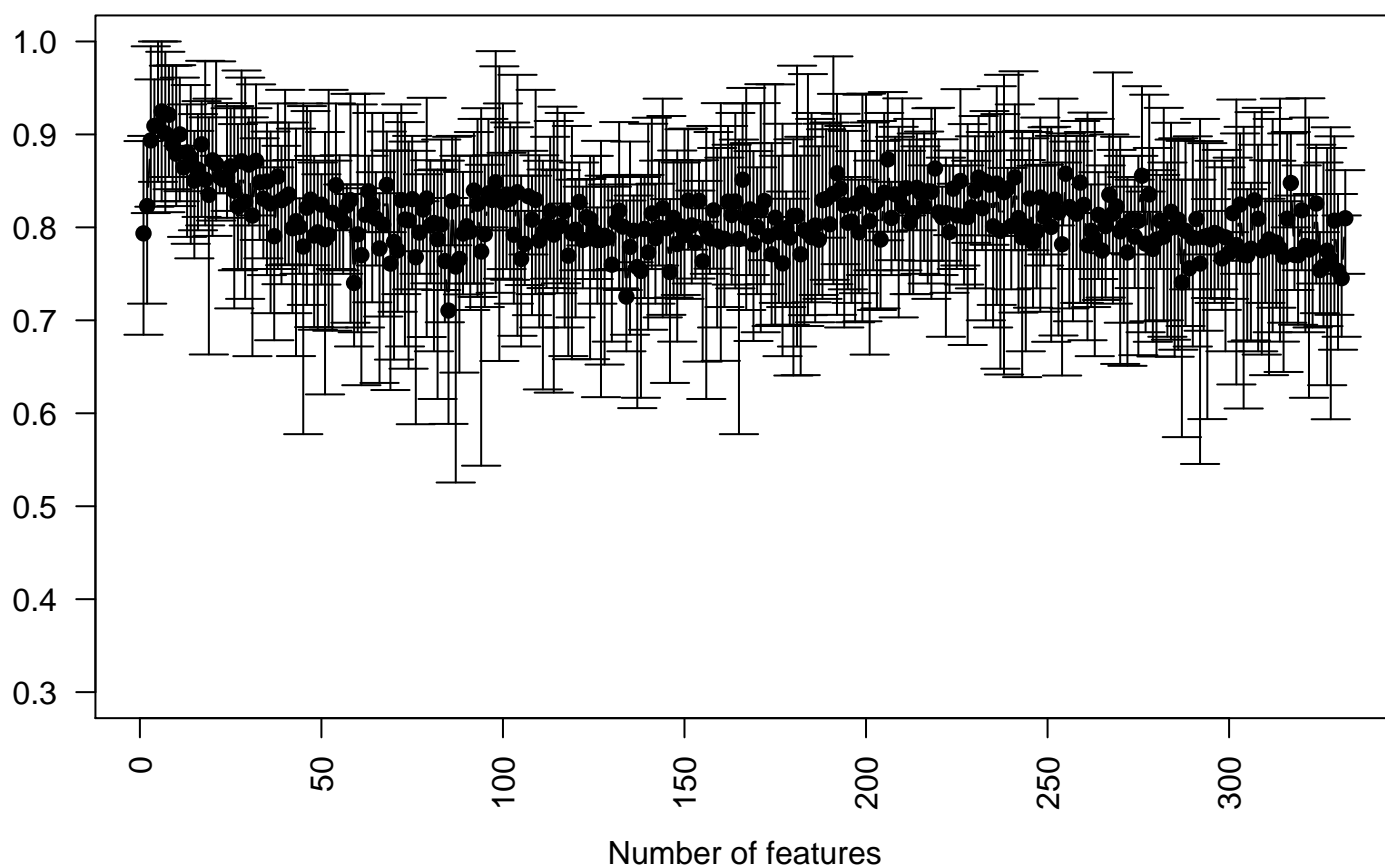

### TOP 20 MOTIFS

Sp1.M00196  
EGR.M00807  
CACCC.binding\_factor.M00721  
zlab\_bidirect\_GABP  
Churchill.M00986  
NF.kappaB\_p50.M00051  
AP.2.M00189  
TGGGGGGGKCCAR\_unknown.M1044  
Egr.1.M00243  
GGGTGGRR\_PAX.4.M1073  
Rb\_E2F.1\_DP.1.M00740  
CCCNNGGAR\_OLF.1.M1147  
GGGAGRR\_MAZ.M1041  
VBP.M00228  
STAT1.M00496  
CCAATNNSNNGCG\_unknown.M1121  
PU.1.M00658  
RP58.M00532  
YGCYRCGC\_unknown.M1047  
STAT1.M00224
